# Supplementary material for: Under the chest pain center mechanism, whether the nursing handover affects the nursing efficiency and the outcomes of patients with STEMI in the emergency department? A retrospective study
Source: Research Square preprint supplement (doi:10.21203/rs.3.rs-1731492/v1), 2022-06-23
Supplement: Supplementary file 2 [file f85df82c05bc7349b49c73bc.xlsx]

## Sheet: Sheet1
	1:male 2:female		1:positive 2:negative																length of hospitalization
cases	gender	age	BMI	current smoking	Dyslipidemia	Diabetes mellitus	Heart failure history	Renal failure history	previous myocardial infarction	Killip class	D2FMC	FMC2FE	FMC2BS	BS2CBR	CBR2FAD	D2W	Major adverse cardiovascular events	Highest troponin values within 72 hours of hospitalization（TNT）	9
1	1	66	23	1	2	2	2	2	2	1	2	2	9	13	1	71	2	271	11
2	1	64	24	1	2	2	2	2	2	2	2	2	11	13	2	73	1	5244	13
3	2	63	26	1	1	2	2	2	2	1	3	3	14	12	1	70	1	2511	12
4	2	61	26	1	1	2	2	2	2	1	2	2	12	12	1	71	2	2111	14
5	2	62	25	1	2	2	2	2	2	2	2	2	13	13	2	68	2	1114	10
6	1	55	27	1	1	2	2	2	2	2	3	2	8	12	2	72	2	965	13
7	2	57	28	2	1	2	2	2	2	3	4	3	5	13	3	68	2	886	12
8	2	60	26	2	1	2	2	2	2	2	2	2	12	13	1	68	2	1204	13
9	1	59	22	2	2	2	2	2	2	2	3	2	12	13	1	69	1	2319	13
10	2	61	26	2	2	2	2	2	2	2	4	2	13	12	2	71	2	199	13
11	1	72	28	2	1	2	1	2	2	2	5	2	9	12	1	67	2	356	12
12	2	73	31	2	1	1	1	1	2	1	2	1	15	14	2	66	2	987	8
13	1	81	32	2	1	1	1	1	2	2	3	2	11	12	2	68	1	2211	9
14	2	66	31	1	1	2	2	1	2	2	4	1	10	13	1	68	2	1985	9
15	1	61	32	1	1	2	2	2	2	2	3	2	12	14	2	69	2	673	11
16	1	52	29	1	1	2	2	2	2	2	3	2	11	12	2	75	2	231	10
17	1	59	30	1	1	2	2	2	2	1	4	3	7	13	1	68	2	572	12
18	2	61	31	1	1	1	2	2	2	1	2	3	11	13	2	74	2	521	13
19	2	60	32	1	1	2	2	2	2	1	3	2	12	14	2	72	1	1872	9
20	1	62	32	2	1	2	2	2	2	2	3	2	11	12	2	64	1	2612	10
21	1	71	31	2	1	2	2	2	2	2	4	2	13	14	2	69	2	1221	11
22	2	70	29	1	1	2	1	1	1	2	3	2	14	12	1	69	2	642	12
23	2	67	28	1	1	2	2	2	2	2	2	3	6	13	1	71	2	468	13
24	2	68	28	1	1	2	2	2	2	1	3	3	12	12	1	72	2	542	17
25	1	58	27	1	2	2	2	2	2	1	2	2	9	12	1	68	2	579	16
26	1	59	27	1	2	2	2	2	2	4	2	2	13	13	1	73	1	10000	15
27	2	60	26	2	2	1	2	2	2	1	3	2	11	13	1	71	1	10000	18
28	2	49	29	1	1	1	2	2	2	1	2	3	16	12	1	69	2	1441	15
29	2	52	28	2	1	2	2	2	2	1	3	2	16	12	1	70	2	973	16
30	2	55	29	1	1	2	2	2	2	1	3	3	10	14	1	72	2	453	14
31	1	54	30	1	1	2	2	2	2	1	4	3	9	12	1	69	1	2315	13
32	2	63	31	1	1	1	2	2	2	1	4	2	11	13	1	71	2	321	18
33	1	65	26	2	1	1	2	2	2	1	3	2	8	14	1	72	2	96	17
34	1	66	26	1	1	2	2	2	2	1	2	1	9	12	2	69	2	911	11
35	1	61	25	1	2	2	2	2	2	1	2	1	8	13	2	68	2	351	10
36	1	63	27	2	1	2	2	2	2	1	2	3	6	13	2	69	2	643	12
37	1	69	28	1	1	2	1	1	2	3	3	3	6	14	2	69	2	1111	13
38	1	68	26	1	1	2	2	2	2	1	4	3	7	12	1	71	2	1213	18
39	1	62	22	1	2	2	2	2	2	1	2	3	8	14	1	68	2	433	12
40	1	63	26	2	2	2	1	1	2	2	3	2	5	12	1	70	1	10000	13
41	1	61	28	1	1	2	2	2	2	2	4	2	9	13	1	68	2	2131	13
42	2	62	31	2	1	2	2	2	2	1	3	2	7	12	2	69	2	221	12
43	1	67	32	1	1	1	1	1	1	1	2	1	8	13	1	70	2	341	12
44	1	62	31	1	1	1	2	2	2	1	3	2	7	13	2	71	2	281	14
45	2	60	29	2	1	2	2	2	2	1	2	3	5	12	1	69	2	654	12
46	1	59	28	2	1	2	1	1	1	1	2	2	9	12	1	69	2	3512	11
47	1	63	29	2	1	2	2	2	2	1	4	3	11	13	1	70	2	2367	13
48	1	64	30	1	1	2	2	2	2	1	3	3	12	12	1	68	2	221	8
49	1	62	31	1	1	1	2	2	2	1	2	3	9	12	1	72	2	651	10
50	1	61	26	1	1	2	2	2	2	1	2	2	8	13	2	70	1	10000	9
51	1	61	26	1	1	2	2	2	2	1	3	2	7	13	2	69	2	321	11
52	1	62	25	1	2	2	2	2	2	1	2	2	8	13	1	71	2	678	12
53	2	63	27	1	2	2	2	2	2	2	2	3	8	13	2	69	2	2351	13
54	1	64	32	1	1	1	2	2	2	2	3	1	7	13	2	69	2	887	17
55	1	65	29	1	1	2	2	2	2	3	2	1	8	14	2	68	2	461	16
56	2	63	30	2	1	2	2	2	2	1	3	2	9	14	2	69	2	79	15
57	1	69	31	2	1	2	1	1	1	1	4	3	8	13	2	61	2	361	17
58	2	73	32	1	1	1	1	1	1	1	5	2	8	15	1	68	1	3513	14
59	1	67	32	1	1	2	2	2	2	1	2	2	7	13	1	69	2	321	13
60	1	68	31	2	1	2	2	2	2	2	3	2	8	14	1	70	2	214	12
61	1	66	29	1	1	2	2	2	2	2	3	2	7	12	1	69	2	1157	16
62	1	65	28	1	1	2	1	2	2	3	2	2	9	14	1	73	2	1231	13
63	1	68	28	2	1	2	1	1	1	1	2	2	10	12	1	62	2	2314	14
64	1	64	29	2	1	2	2	2	2	1	3	1	11	13	1	67	2	4121	15
65	1	62	30	1	1	2	2	2	2	1	3	1	9	12	1	69	1	8964	11
66	2	61	26	1	2	2	2	2	2	2	2	2	9	12	1	72	2	213	12
67	2	60	27	1	2	2	2	2	2	2	2	1	8	13	1	68	2	556	10
68	2	63	25	2	2	2	2	2	2	3	3	1	8	13	1	74	2	7762	11
69	2	64	25	1	2	2	2	2	2	1	2	3	8	12	1	69	2	6563	13
70	1	65	28	2	1	2	2	2	2	1	2	3	8	12	1	68	2	2351	9
71	1	61	29	1	1	2	2	2	2	1	3	3	8	14	1	71	2	2316	9
72	1	60	31	1	1	2	2	2	2	1	3	3	7	12	1	73	1	7568	10
73	2	58	31	2	1	2	2	2	2	1	3	2	4	13	1	71	2	1999	13
74	1	59	32	1	1	2	2	2	2	2	2	2	4	14	1	68	2	3453	12
75	1	51	29	1	1	2	2	2	2	2	3	2	3	13	1	68	2	4312	13
76	1	62	30	1	1	2	2	2	2	1	3	1	4	14	1	69	2	3261	15
77	1	63	31	2	1	1	2	2	2	1	3	2	5	12	2	73	2	686	10
78	2	64	32	2	1	2	2	2	2	4	3	2	7	14	1	69	2	547	11
79	1	63	32	2	1	1	2	2	2	1	2	3	8	12	1	72	2	752	13
80	2	63	31	1	1	2	2	2	2	4	2	3	7	13	2	69	1	7221	14
81	1	61	29	1	1	2	2	2	2	1	3	2	8	12	2	73	2	912	15
82	1	62	28	1	1	2	2	2	2	1	3	2	5	13	1	74	2	1197	17
83	1	60	28	2	1	2	2	2	2	1	3	2	9	13	1	69	1	9961	12
84	1	61	30	2	1	2	2	2	2	1	4	2	7	12	1	69	2	6221	15
85	1	62	30	2	1	2	2	2	2	1	4	1	8	12	1	68	2	4521	14
86	1	63	29	1	1	2	2	2	2	2	3	2	7	13	1	72	1	7771	17
87	2	69	28	1	1	2	1	1	1	2	2	3	5	12	1	69	1	3199	16
88	2	63	29	1	1	2	2	2	2	2	2	2	9	12	1	69	2	887	15
89	1	62	31	2	1	2	2	2	2	1	2	2	8	13	1	73	2	2110	18
90	1	61	32	2	1	1	2	2	2	2	3	2	7	13	2	71	2	1863	14
91	1	67	31	2	1	1	1	1	1	2	4	3	8	13	2	70	2	211	16
92	2	62	28	2	1	2	2	2	2	1	2	3	7	13	2	71	2	999	12
93	1	63	29	1	1	2	2	2	2	1	3	2	9	13	2	69	1	9998	11
94	1	61	30	1	1	2	2	2	2	1	4	3	8	12	2	76	2	2110	14
95	1	62	31	1	1	2	2	2	2	1	3	3	7	12	1	69	2	2341	12
96	1	67	26	1	2	2	1	1	1	2	2	2	6	14	1	67	2	6874	13
97	2	62	26	1	2	2	2	2	2	2	3	2	6	12	1	66	2	5211	12
98	1	60	25	2	2	2	2	2	2	1	2	3	4	13	2	69	2	1198	13
99	1	59	27	2	1	2	2	2	2	1	2	2	4	14	1	64	2	2317	13
100	1	60	28	2	1	2	2	2	2	1	2	1	5	12	1	68	1	2561	13
101	1	67	26	2	1	2	2	2	2	1	3	2	8	13	1	69	2	1653	13
102	1	66	22	2	2	2	2	2	2	1	2	2	9	13	1	64	2	3622	13
103	1	63	26	2	1	2	2	2	2	1	3	2	4	14	1	67	2	326	14
104	2	64	28	1	1	2	2	2	2	2	3	2	4	12	1	68	2	799	12
105	2	61	31	1	1	2	2	2	2	2	2	1	5	14	1	69	2	4102	14
106	1	59	32	1	1	1	2	2	2	1	3	2	8	12	1	67	2	291	16
107	1	58	31	2	1	1	2	2	2	1	3	1	8	13	1	68	2	278	15
108	1	49	29	2	1	2	2	2	2	2	2	2	9	12	1	69	1	2987	14
109	2	64	28	1	1	2	2	2	2	1	4	2	9	13	1	68	2	211	14
110	1	63	29	1	2	2	2	2	2	1	4	2	9	13	1	69	2	299	16
111	1	61	32	1	1	1	2	2	2	3	5	2	7	14	1	66	2	264	17
112	2	62	29	2	1	2	2	2	2	1	3	3	8	13	2	67	1	8997	15
113	1	67	30	2	1	2	1	1	1	4	3	3	8	13	2	69	2	211	17
114	2	62	31	2	1	1	2	2	2	1	3	2	8	14	2	71	1	9884	15
115	1	60	32	1	1	1	2	2	2	1	4	1	9	15	2	69	2	411	16
116	1	64	32	1	1	1	2	2	2	1	3	3	8	13	2	70	2	422	16
117	1	63	31	1	1	1	2	2	2	1	4	2	11	14	2	73	2	367	15
118	2	61	29	2	1	2	2	2	2	1	2	2	12	13	2	68	2	996	14
119	1	62	28	2	1	2	2	2	2	2	2	3	8	13	1	67	2	1002	12
120	1	55	28	2	1	2	2	2	2	2	3	2	7	12	1	69	2	2019	16
121	2	57	30	2	1	2	2	2	2	2	3	1	7	12	1	68	2	299	17
122	1	60	30	1	1	2	2	2	2	4	4	2	8	13	1	72	1	5110	15
123	1	59	29	1	1	2	2	2	2	1	2	2	8	12	1	68	2	2131	14
124	1	61	28	1	1	2	2	2	2	3	3	2	8	13	1	66	2	1768	17
125	1	68	29	1	1	2	1	1	1	1	4	2	5	13	1	69	2	3098	15
126	2	62	31	1	1	1	2	2	2	1	2	3	4	13	1	67	2	5041	14
127	1	63	30	2	1	2	2	2	2	1	3	2	6	12	1	69	2	2881	18
128	1	61	31	2	1	2	2	2	2	3	4	2	8	12	2	69	1	6996	19
129	1	62	26	2	1	2	2	2	2	1	3	3	7	14	2	68	1	5981	20
130	1	67	26	2	1	2	2	2	2	2	3	2	7	12	2	68	1	4721	15
131	2	62	25	2	2	2	2	2	2	2	2	3	8	13	2	71	2	1274	14
132	1	60	27	1	2	2	2	2	2	2	3	2	8	14	1	68	2	285	16
133	1	59	28	1	1	1	2	2	2	3	4	2	5	12	1	72	2	777	14
134	1	63	26	1	2	2	1	2	2	1	3	2	5	13	1	69	2	689	16
135	1	60	26	2	2	2	2	2	2	1	3	2	8	13	1	77	2	452	12
136	1	61	26	2	2	1	2	2	2	1	3	2	4	14	1	68	2	896	11
137	1	62	28	2	1	1	2	2	2	1	4	2	5	12	1	70	2	971	14
138	1	63	31	1	1	1	2	2	2	1	3	3	6	14	1	71	2	2901	12
139	2	69	32	1	1	1	2	2	2	1	2	2	8	12	2	69	2	2114	9
140	1	63	31	1	1	1	2	2	2	2	3	2	7	13	1	69	2	1537	11
141	1	62	29	2	1	1	2	2	2	3	4	2	8	12	2	61	2	1953	12
142	2	61	28	2	1	2	2	2	2	2	3	2	8	12	1	69	2	2115	13
143	1	67	29	2	1	2	1	1	1	2	2	3	8	12	1	69	2	2331	14
144	1	62	30	2	1	1	2	2	2	2	3	1	5	14	1	68	2	647	16
145	1	63	31	1	1	1	2	2	2	2	2	1	6	12	1	67	2	4721	16
146	1	61	26	1	2	2	2	2	2	2	3	2	5	13	1	71	2	964	15
147	2	62	26	1	2	2	2	2	2	2	3	3	6	14	2	69	2	467	11
148	1	63	25	1	2	2	2	2	2	1	2	2	7	12	1	67	2	983	12
149	1	61	27	1	1	2	2	2	2	1	3	2	8	13	1	69	2	1992	13
150	1	64	32	2	1	1	2	2	2	1	3	2	7	13	1	68	2	2111	14
151	1	62	29	2	1	1	2	2	2	1	2	2	7	14	1	72	2	2613	14
152	1	67	30	2	1	1	2	2	2	1	4	2	6	12	1	68	2	1621	16
153	1	68	31	2	1	1	2	2	2	2	4	2	5	13	1	66	2	331	15
154	2	68	32	2	1	1	2	2	2	2	5	2	8	13	2	69	2	758	14
155	1	69	32	1	1	1	1	1	2	2	3	3	8	14	2	67	2	924	18
156	1	71	31	1	1	1	2	2	2	1	3	2	6	15	1	69	1	3419	17
157	1	71	29	1	1	1	1	1	1	1	3	1	8	13	1	69	1	8321	17
158	2	77	28	2	1	1	1	2	2	2	4	2	6	13	1	68	2	1123	15
159	1	61	28	2	1	2	2	2	2	1	3	2	8	12	1	68	2	241	14
160	1	62	29	2	1	2	2	2	2	1	4	2	8	13	1	71	2	1112	15
161	1	62	30	1	1	1	2	2	2	1	5	2	4	13	2	68	2	2131	9
162	1	61	30	1	1	1	2	2	2	1	2	3	8	14	1	72	2	2831	7
163	1	64	31	1	1	1	2	2	2	1	3	2	8	13	1	69	2	1743	12
164	2	65	29	2	1	2	2	2	2	1	3	2	5	13	1	69	2	1443	12
165	1	72	29	2	1	2	2	2	2	1	2	3	8	14	2	73	2	1856	8
166	1	70	31	2	1	1	2	2	2	1	2	3	6	13	2	68	2	1245	11
167	1	68	32	2	1	1	1	1	1	1	3	3	6	13	2	72	2	1975	12
168	1	66	31	1	1	1	2	2	2	1	3	2	8	13	2	69	2	2742	9
169	1	65	30	1	1	1	1	1	1	2	2	2	5	13	1	66	2	2952	9
170	1	68	33	1	1	1	2	2	2	3	2	3	5	14	1	71	2	1647	11
171	2	67	32	1	1	1	2	2	2	1	3	2	8	13	1	64	2	689	12
172	1	59	29	1	1	2	2	2	2	1	2	2	4	13	1	69	2	589	13
173	1	58	28	2	1	2	2	2	2	1	2	3	8	14	2	69	2	3112	14
174	1	61	29	2	1	2	2	2	2	1	3	3	7	13	1	67	2	742	15
175	1	60	30	2	1	1	2	2	2	2	3	3	8	13	1	65	2	6341	14
176	1	61	31	2	1	1	2	2	2	1	3	2	7	13	1	69	2	571	15
177	1	62	26	2	2	1	2	2	2	1	3	2	8	13	1	71	2	495	14
178	2	62	26	1	2	2	2	2	2	1	3	2	7	12	1	70	2	3886	15
179	1	63	25	1	2	2	2	2	2	2	3	2	6	12	2	70	2	1257	16
180	1	61	27	1	1	2	2	2	2	1	3	1	7	13	2	71	2	2888	15
181	1	63	28	2	1	2	2	2	2	1	2	1	8	13	1	71	2	2952	14
182	1	69	26	2	2	2	1	1	2	1	3	2	8	14	1	71	2	1952	15
183	2	63	22	2	2	2	2	2	2	1	2	2	6	13	1	72	2	796	11
184	1	62	26	1	2	2	2	2	2	2	3	2	7	14	1	68	2	311	12
185	1	61	28	1	1	2	2	2	2	2	3	2	8	12	1	66	2	286	13
186	1	62	31	1	1	1	2	2	2	3	2	2	7	13	1	69	2	356	14
187	2	62	32	2	1	1	2	2	2	1	2	2	7	13	1	67	2	2515	14
188	1	63	31	2	1	1	2	2	2	1	3	2	6	14	1	69	2	1886	16
189	1	62	29	2	1	2	2	2	2	2	2	3	5	15	1	69	2	1992	15
190	2	61	28	2	1	2	2	2	2	2	2	2	8	13	2	68	2	3110	14
191	1	66	29	1	1	1	1	1	1	1	3	1	8	13	1	68	2	3182
										12

## Sheet: Sheet2
	1:male 2:female			1:positive 2:negative
cases	gender	age	BMI	current smoking	Dyslipidemia	Diabetes mellitus	Heart failure history	Renal failure history	previous myocardial infarction	Killip class	D2FMC	FMC2FE	FMC2BS	BS2CBR	CBR2FAD	D2W	Major adverse cardiovascular events	Highest troponin values within 72 hours of hospitalization（TNT）	length of hospitalization
1	1	62	30	1	1	2	2	2	2	1	3	2	8	14	2	70	2	523	13
2	1	63	30	1	1	2	2	2	2	1	3	2	9	13	2	68	2	2358	14
3	1	61	29	1	1	2	2	2	2	1	3	2	9	13	1	69	2	94	15
4	2	62	28	1	1	2	2	1	2	1	3	2	11	13	2	75	2	2314	15
5	1	67	29	2	1	2	2	2	1	2	2	2	19	14	2	68	2	3210	11
6	1	62	31	2	1	2	1	2	2	1	2	3	18	12	3	74	2	986	12
7	1	60	30	2	1	1	1	2	2	1	3	2	10	14	3	72	2	3221	13
8	2	59	31	1	1	1	1	2	2	1	3	1	9	13	1	66	2	1992	13
9	1	60	26	1	2	2	1	2	2	1	4	2	9	13	2	69	2	2118	14
10	1	67	26	2	2	2	2	2	1	1	4	2	7	14	2	69	2	3182	15
11	1	66	25	2	2	2	2	2	2	3	3	2	8	12	3	71	2	899	12
12	2	63	33	2	1	1	2	2	2	1	2	3	6	13	3	72	1	8765	17
13	1	64	29	2	1	2	2	2	2	1	2	2	7	13	2	68	1	6556	16
14	1	61	31	1	1	1	2	1	2	2	2	2	8	13	3	73	1	7442	20
15	1	59	32	1	1	1	2	2	2	1	3	1	8	13	2	71	2	3201	15
16	1	58	30	1	1	1	2	2	2	1	4	2	6	14	2	69	2	2112	15
17	1	59	31	1	1	1	1	2	2	4	2	3	10	12	2	70	2	984	14
18	1	64	31	1	1	1	2	2	2	1	3	2	11	13	2	72	2	688	9
19	2	62	28	2	2	2	2	2	2	1	4	2	12	14	2	69	2	2095	8
20	1	61	30	2	1	1	2	2	2	1	3	2	12	13	2	71	2	853	11
21	1	63	30	2	1	1	2	2	2	1	3	3	9	13	2	72	2	864	13
22	1	69	29	2	1	1	2	2	2	1	4	1	9	13	3	69	1	764	17
23	1	63	28	1	1	2	2	2	1	1	4	2	9	14	2	70	2	2351	12
24	1	62	29	2	1	1	2	2	2	2	3	2	9	13	2	69	2	699	13
25	2	61	31	2	1	1	2	1	2	3	3	2	10	14	3	73	2	2112	15
26	1	62	30	2	1	1	2	2	2	2	3	2	11	14	3	72	2	2910	15
27	1	62	31	1	1	1	2	2	2	2	3	2	10	14	3	72	2	1857	15
28	2	67	26	1	2	2	2	2	2	3	4	2	9	14	3	71	2	2950	14
29	1	62	26	1	2	2	2	2	2	3	3	2	8	13	3	72	2	2912	15
30	1	60	25	2	2	2	2	2	2	1	2	3	9	14	2	72	2	859	15
31	1	64	27	2	2	2	2	2	2	1	3	3	10	13	2	71	1	8874	16
32	2	63	28	2	1	2	1	2	2	1	2	2	7	14	3	74	2	2931	12
33	1	61	29	2	1	2	2	2	2	2	2	3	9	12	3	72	2	286	13
34	1	62	25	1	2	2	1	2	2	3	3	2	11	14	2	66	2	3021	13
35	1	63	26	1	2	2	2	2	2	1	3	1	12	13	2	70	2	842	14
36	2	61	27	1	1	2	2	2	1	4	4	2	11	13	2	69	1	6775	15
37	1	62	30	2	1	1	2	1	2	1	4	2	12	14	3	71	2	1262	12
38	1	67	29	1	1	2	2	2	2	1	2	3	11	14	3	70	2	2958	13
39	2	62	30	2	1	1	2	2	2	1	2	2	12	13	2	71	2	1869	14
40	2	60	31	1	1	1	2	2	1	1	2	3	12	13	2	72	2	994	14
