# Supplementary material for: Under the chest pain center mechanism, whether the nursing handover affects the nursing efficiency and the outcomes of patients with STEMI in the emergency department? A retrospective study
Source: Research Square preprint supplement (doi:10.21203/rs.3.rs-1731492/v1), 2022-06-23
Supplement: Supplementary file 3 [file c55c4e60c3692c6d661eb621.docx]

|  | | Levene's Test for Equality of Variances | | t-test for Equality of Means | | | | | | |
| --- | --- | --- | --- | --- | --- | --- | --- | --- | --- | --- |
| F | Sig. | t | df | Sig. (2-tailed) | Mean Difference | Std. Error Difference | 95% Confidence Interval of the Difference | |
| Lower | Upper |
| Gender | Equal variances assumed | .771 | .381 | -.419 | 229 | .676 | -.03272 | .07813 | -.18667 | .12122 |
| Equal variances not assumed |  |  | -.427 | 57.655 | .671 | -.03272 | .07665 | -.18617 | .12073 |
| Age | Equal variances assumed | 5.506 | .020 | -.656 | 229 | .513 | -.46387 | .70721 | -1.85735 | .92960 |
| Equal variances not assumed |  |  | -.923 | 95.909 | .358 | -.46387 | .50259 | -1.46152 | .53377 |
| BMI | Equal variances assumed | 1.180 | .278 | .408 | 229 | .684 | .16584 | .40653 | -.63518 | .96685 |
| Equal variances not assumed |  |  | .444 | 62.165 | .658 | .16584 | .37317 | -.58008 | .91176 |
| CM | Equal variances assumed | .317 | .574 | .511 | 229 | .610 | .04450 | .08703 | -.12699 | .21599 |
| Equal variances not assumed |  |  | .507 | 56.024 | .614 | .04450 | .08784 | -.13146 | .22046 |
| Dys | Equal variances assumed | 2.735 | .100 | .884 | 229 | .378 | .06152 | .06962 | -.07567 | .19870 |
| Equal variances not assumed |  |  | .821 | 52.850 | .415 | .06152 | .07492 | -.08876 | .21180 |
| DM | Equal variances assumed | 6.223 | .013 | -1.796 | 229 | .074 | -.14634 | .08148 | -.30689 | .01422 |
| Equal variances not assumed |  |  | -1.694 | 53.540 | .096 | -.14634 | .08637 | -.31952 | .02685 |
| HFH | Equal variances assumed | 1.516 | .220 | -.637 | 229 | .525 | -.03887 | .06106 | -.15918 | .08143 |
| Equal variances not assumed |  |  | -.591 | 52.828 | .557 | -.03887 | .06573 | -.17073 | .09298 |
| RFH | Equal variances assumed | .550 | .459 | .364 | 229 | .716 | .02042 | .05609 | -.09011 | .13094 |
| Equal variances not assumed |  |  | .381 | 59.407 | .704 | .02042 | .05353 | -.08667 | .12751 |
| PMI | Equal variances assumed | 2.555 | .111 | -.822 | 229 | .412 | -.04123 | .05013 | -.14001 | .05755 |
| Equal variances not assumed |  |  | -.728 | 50.828 | .470 | -.04123 | .05664 | -.15496 | .07249 |
| KC | Equal variances assumed | 3.044 | .082 | .278 | 229 | .781 | .03691 | .13282 | -.22480 | .29862 |
| Equal variances not assumed |  |  | .242 | 50.230 | .810 | .03691 | .15248 | -.26933 | .34315 |
| D2FMC | Equal variances assumed | .279 | .598 | .541 | 229 | .589 | .07160 | .13235 | -.18919 | .33238 |
| Equal variances not assumed |  |  | .559 | 58.506 | .578 | .07160 | .12807 | -.18471 | .32790 |
| FMC2FE | Equal variances assumed | .855 | .356 | -.156 | 229 | .876 | -.01636 | .10504 | -.22332 | .19060 |
| Equal variances not assumed |  |  | -.164 | 59.920 | .870 | -.01636 | .09947 | -.21534 | .18261 |
| FMC2BS | Equal variances assumed | .248 | .619 | 4.953 | 229 | .000 | 2.07683 | .41927 | 1.25072 | 2.90295 |
| Equal variances not assumed |  |  | 4.654 | 53.348 | .000 | 2.07683 | .44623 | 1.18195 | 2.97171 |
| BS2CBR | Equal variances assumed | .180 | .671 | 2.917 | 229 | .004 | .38377 | .13155 | .12458 | .64296 |
| Equal variances not assumed |  |  | 3.282 | 64.764 | .002 | .38377 | .11693 | .15023 | .61731 |
| CBR2FAD | Equal variances assumed | 3.749 | .054 | 11.665 | 229 | .000 | 1.00563 | .08621 | .83576 | 1.17550 |
| Equal variances not assumed |  |  | 10.379 | 51.034 | .000 | 1.00563 | .09689 | .81111 | 1.20015 |
| D2W | Equal variances assumed | .025 | .875 | 3.461 | 229 | .001 | 1.38010 | .39877 | .59438 | 2.16583 |
| Equal variances not assumed |  |  | 3.812 | 63.013 | .000 | 1.38010 | .36207 | .65656 | 2.10365 |
| MDCE | Equal variances assumed | .003 | .953 | .029 | 229 | .977 | .00183 | .06262 | -.12155 | .12521 |
| Equal variances not assumed |  |  | .029 | 56.350 | .977 | .00183 | .06283 | -.12400 | .12767 |
| HTV72H | Equal variances assumed | .461 | .498 | .697 | 229 | .486 | 289.64568 | 415.42537 | -528.89904 | 1108.19040 |
| Equal variances not assumed |  |  | .742 | 60.437 | .461 | 289.64568 | 390.47588 | -491.30630 | 1070.59766 |
| LOH | Equal variances assumed | 2.484 | .116 | .963 | 229 | .337 | .40209 | .41750 | -.42053 | 1.22472 |
| Equal variances not assumed |  |  | 1.053 | 62.441 | .296 | .40209 | .38187 | -.36114 | 1.16532 |
